## 1 Gait stability in ambulant children with cerebral palsy during dual tasks

2 *Sophie Wist*<sup>1,2</sup>, *Lena Carcreff*<sup>2</sup>, *Sjoerd M. Bruijn*<sup>3</sup>, *Gilles Allali*<sup>4</sup>, *Christopher J. Newman*<sup>5</sup>,  
3 *Joel Fluss*<sup>6</sup>, *Stéphane Armand*<sup>2</sup>

4 <sup>1</sup> Zürcher Hochschule für Angewandte Wissenschaften, ZHAW, Institut für Physiotherapie, Winterthur 8400, Switzerland

5 <sup>2</sup> Kinesiology Laboratory , Geneva University Hospitals and University of Geneva, Geneva 1211, Switzerland

6 <sup>3</sup> Department of Human Movement Sciences, Vrije University Amsterdam, Amsterdam 1081, Netherlands

7 <sup>4</sup> Department of Neurology, Geneva University Hospitals and University of Geneva, Geneva 1211, Switzerland

8 <sup>5</sup> Pediatric Neurology and Neurorehabilitation Unit, Department of Pediatrics, Lausanne University Hospital, 1011, Lausanne,  
9 Switzerland

10 <sup>6</sup> Pediatric Neurology Unit, Children's Hospital, Geneva University Hospitals, Geneva 1211, Switzerland

11

## 12 Abstract

13 **Aim** The aim of this prospective cross-sectional study with matched controls was to measure the effect of  
14 dual tasks on gait stability in ambulant children with cerebral palsy (CP) compared to typically developing  
15 (TD) children.

16 **Methods** The children of the CP (n= 20) and TD groups (n=20) walked first without a dual task, then while  
17 counting and finally while alternatively naming fruits and animals (DT<sub>f/a</sub>). They then completed the same  
18 cognitive exercises while sitting comfortably. We calculated the distance between the foot placement  
19 estimator (FPE) and the real foot placement in the anterior direction (D<sub>FPEAP</sub>) and in the mediolateral  
20 direction (D<sub>FPEML</sub>) as a measure of gait stability, in a gait laboratory using an optoelectronic system.  
21 Cognitive scores were computed. Comparisons within and between groups were analysed with linear  
22 mixed models.

23 **Results** The dual task had a significant effect on the CP group in D<sub>FPEAP</sub> and D<sub>FPEML</sub>. The CP group was more  
24 affected than the TD group during dual task in the D<sub>FPEML</sub>. Children in both groups showed significant  
25 changes in gait stability during dual tasks.

26 **Interpretation** The impact of dual task on gait stability is possibly due to the sharing of attention between  
27 gait and the cognitive task. All children favoured a 'posture second' strategy during the dual task of  
28 alternatively naming animals and fruits. Children with CP increased their mediolateral stability during dual  
29 task.

30

31 Keywords: Cerebral palsy, dual-task, gait stability, foot placement estimator

32

### 33 Introduction

34 Cerebral palsy (CP) is a permanent neurological disorder caused by non-progressive brain lesions  
35 occurring before, during or in the months after birth(1). With a prevalence of 1.77 per 1000 live  
36 births in Europe, CP is the most common cause of significant motor impairment in children (2).  
37 Stability is reduced in children with CP because of motor and cognitive impairments, which can  
38 lead to falls (3). Most falls happen while walking, one of the most frequent motor activities (4). If a  
39 child is able to ambulate independently, she/he will consequently increase her/his risk of falling  
40 (3). Children with disabilities are more exposed to concussion when falling than non-disabled  
41 children, who generally suffer from less severe damage, such as upper limb injuries (5). Petridou  
42 et al. (5) also found that children with disabilities experience more falls at school or at home during  
43 necessary activities in comparison to accident rates in children with typical development (TD),  
44 which happen mostly during leisure activities.

45 Gait stability measurements assess the ability to walk without falling and are dependent on a  
46 person's neuromuscular ability not to fall when exposed to sources of disturbance (4). Several  
47 measurements or estimators of gait stability have been proposed, such as the foot placement  
48 estimator (FPE) (6), variability measures (7), extrapolated centre of mass (8), maximum Lyapunov  
49 exponent (9) and maximum Floquet multiplier (10).

50 Among these parameters, the FPE, which estimates where the foot should be placed to come to  
51 a standstill state at mid-stance (4), seems relevant for children with CP. This measure was  
52 developed by Wight in 2008, firstly for robotic applications (11). It was then tested on healthy  
53 humans under different walking speeds and activities (6, 11-13). It has also been used for children  
54 with CP (14, 15). It differentiates them from children with TD (15). For example Bruijn et al (15)  
55 showed, that children tend to place their feet near the FPE in the anterior position while walking  
56 at self-selected speed, whereas when the walking speed increased, they tend to increase the  
57 distance between the real foot placement and the FPE. The FPE method is the only gait stability  
58 measure to integrate the assumption of conservation of angular momentum, integrating in its  
59 calculation the loss of energy and velocity which is present in human gait (16). Moreover, only a  
60 small number of strides are needed to get valid results, whereas numerous strides are needed  
61 with other methods such as Floquet multipliers or variability measures (15).

62 A combination of two activities carried out at the same time, for example talking while walking, is  
63 referred to as a dual-task, and is one of the sources of disturbance that occurs in daily-life (17).  
64 The central capacity sharing model describes that when two tasks are processed at the same  
65 time, both tasks will be affected and potentially worsened (18). It implies that gait requires  
66 attention, and that it is not an automatic process (18). Most interferences at the cortical level  
67 appear in single-limb stance, when postural adjustments are planned (19). Boonyong et al. (20)  
68 found a reduced anteroposterior centre of mass (CoM) sway in children with TD while walking  
69 under dual-task, and suggested that they modified their walking speed and step length to improve  
70 stability. In children with CP, decreased gait speed, stride length (21, 22) and anteroposterior trunk  
71 acceleration, as well as increased lateral trunk acceleration, have been shown during dual tasks  
72 compared to unchallenging gait (17, 21, 22). To our knowledge, there is no previous study  
73 measuring gait stability using the FPE during dual tasks in children with CP.

74 This study aimed to investigate gait stability during dual tasks in children with CP with the use of  
75 the FPE. We firstly hypothesised that children with CP would show a larger distance between real  
76 foot placement and FPE under dual tasks than under simple task, in order to stabilise their gait

77 while performing a concurrent cognitive task. Our second hypothesis was that the dual-task effect  
78 would be higher in children with CP than in children with TD. These findings could lead to a better  
79 understanding of gait stability in children with CP in ecological situations.

## 80 **Method**

81 The design was a prospective cross-sectional study with matched controls. It was conducted in a  
82 clinical setting. The study was approved by the ethical committee of canton Geneva in 2015  
83 (CCER-15-203).

## 84 **Participants**

85 The study population consisted of children with CP between the ages of 8 and 16 years with level  
86 I or II according to the Gross Motor Function Classification System (GMFCS) (23), as well as age-  
87 matched children with TD.

88 The sample consisted of two groups, children with CP (CP group) and age-matched children with  
89 TD (TD group). Children were age matched with peers, with a range of  $\pm 1.5$  years. This  
90 corresponds to the approximate age range present in a classroom with children who have the  
91 same level of semantic fluency (24).

92 In order to be included in the CP group, children had to be able to walk a minimum of 50 metres  
93 without any assistance and had to follow a regular school curriculum. Exclusion criteria were an  
94 intelligence quotient (IQ) below 80 and behavioural problems. For the TD group, the exclusion  
95 criteria were an IQ lower than 80, behavioural problems, and any other issues affecting gait or  
96 cognitive performance.

97 Children with CP were recruited among patients followed at Geneva University Hospitals (HUG)  
98 and patients sent to the laboratory for gait analysis. Children with TD were recruited through  
99 investigators' and patients' families and friends. Every child, as well as their parents, read and  
100 signed an informed consent.

101 Sample size calculation was based on the effect size of a study measuring gait speed during  
102 simple and dual-task in a similar population (21). They found an effect size of 0.97 on the dual-  
103 task constraint of identification of a common sound. With an  $\alpha$  error probability of 0.05 and a  $\beta$  =  
104 of 0.80, a sample size of 14 children per group was required (computed by G\*power). Because of  
105 the high heterogeneity in age and the different CP types, we decided to increase this number to  
106 20 children per group.

## 107 **Protocol**

108 The data collection was performed in the Kinesiology Laboratory at HUG between February 2016  
109 and March 2019. The trajectory of 35 reflective markers positioned according to the Conventional  
110 Gait Model (25) was registered while walking, by a 12-camera optoelectronic system (Oqus 7+,  
111 Qualisys, Gothenburg, Sweden). The examination started with the height, weight and lower limb  
112 strength. Then they walked 10 metres barefoot at a self-selected pace during 3 trials. The first trial  
113 was the simple motor task. During the next two trials, they had to perform cognitive tasks in a  
114 random order while walking, with a 30-second break in between. The easiest task consisted in  
115 counting out loud forward from zero ( $DT_{count}$ ). The fluency task, which was considered as the

116 hardest cognitive task, was alternatively listing fruits and animals ( $DT_{f/a}$ ). The time taken to execute  
117 the dual-task trials was recorded. This was followed by the measurements of cognitive  
118 performance while the participant was sat comfortably on a chair with back-and armrests. The  
119 simple cognitive tasks were the same as under dual-task constraint. The patients were granted as  
120 much time for these tasks as they used to execute the walking dual tasks.

## 121 Outcomes

122 The primary outcome was the FPE (6) which was separated into 2 parts: the distance from the  
123 foot to the FPE in the anteroposterior direction ( $D_{FPEAP}$ ) and in the mediolateral direction ( $D_{FPEML}$ ).  
124 Firstly, we computed the centre of mass (CoM) from 14 segments weighted average CoM (26).  
125 Those estimations relied on an anthropometric model (27, 28) that uses the participants' mass  
126 and height. The inertia of each segment was calculated using the total body CoM as a reference  
127 (6). The ground projection of the CoM was calculated as  $CoM_p$  (26). From the  $CoM_p$ , the angular  
128 momentum of the total body and the plane of progression were determined (13). The FPE, which  
129 represents the ideal placement of the foot to guarantee stability for an inverted pendulum (15),  
130 was computed using the inverted pendulum model and the total body inertia. The distance  
131 between FPE and the most anterior marker placed on the 2nd metatarsal ( $D_{FPEAP}$ ) and the  
132 distance between FPE and the most lateral point of the foot, which was either the lateral malleolus  
133 marker or the 5<sup>th</sup> metatarsal marker ( $D_{FPEML}$ ) were used for the statistical analysis (4, 13, 29).  
134 Positive values of  $D_{FPEAP}$  and  $D_{FPEML}$  indicate that the foot is placed respectively behind and  
135 medial to the calculated FPE, as illustrated on Figure 1. In the case of positive values, the CoM  
136 movement can not be stopped within a step; the more negative the values are, the more likely this  
137 movement can be stopped, and the more stable the subject (15). We used the results of the  
138 affected leg in case of unilateral CP and chose the most affected leg for children with diplegia,  
139 based on muscular strength of the lower limb during clinical examination. This was tested using  
140 the manual muscle testing (MMT). In the TD group all FPE results were arbitrarily taken from the  
141 right leg.

142 Secondary outcomes were cognitive scores and gait parameters (speed, speed normalized by leg  
143 length, cadence, step length and step width computed from the marker trajectories). Correct  
144 answers of the cognitive tasks were counted per second for a cognitive score. Invented words and  
145 repetitions were excluded, as well as omissions of numbers while counting. The FPE and the gait  
146 parameters were computed using MATLAB (MATLAB 2016b, MathWorks, MA, USA) for each trial

7 (30).

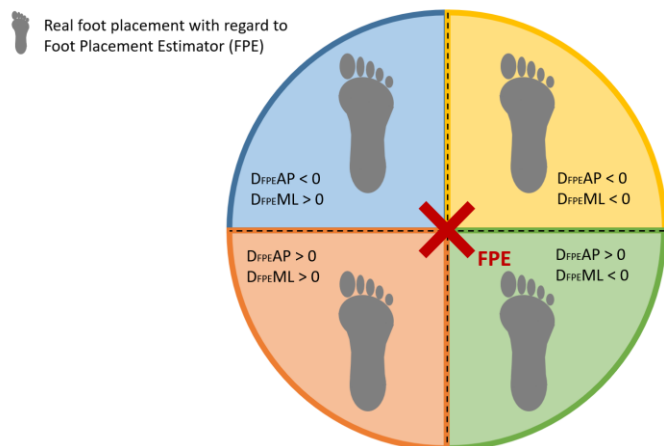

8 **Figure 1 - Values of the**  
9 **distance between the real**  
10 **foot and the foot placement**  
11 **estimator ( $D_{FPE}$ ) in the**  
12 **anteroposterior (AP) and**  
13 **mediolateral directions**  
14 **(ML) with regards to 4 areas**  
15 **of real foot placement**

6

## 157 **Statistical analysis**

158 The statistical analyses were executed using R v.4.0.4 and the RStudio interface (v.1.4.1, Rstudio  
159 Team). To assess how the  $D_{FPE}$  varied between Groups and Task individual linear mixed models  
160 were fit for the  $D_{FPE}$  values. This was calculated for each plane (AP and ML) and regressed on  
161 Group and Task. When the interaction was found significant the model with interaction of the  
162 Group by Task was used. The significance of the interaction was assessed by an ANOVA between  
163 the models with (equation 1) and without (equation 2) interaction. Additionally, random intercepts  
164 were fit for each pair of individuals (Pair ID) to account for pair matching. To determine whether  
165 the interaction effect remained significant when covariates were included, normalized gait speed  
166 was added to each model and retained if significant ( $p < 0.05$ ). The normalized gait speed was  
167 centered about its mean value across all individuals and Tasks.

168 (eq. 1) Model with interaction:  $D_{FPE} \sim \text{Group} * \text{Task} + (\text{speed} - \text{mean speed}) \mid \text{Pair ID}$

169 (eq. 2) Model without interaction:  $D_{FPE} \sim \text{Group} + \text{Task} + (\text{speed} - \text{mean speed}) \mid \text{Pair ID}$

170 The Task effect was used to verify our first hypothesis which was that the CP group would  
171 demonstrate a larger  $D_{FPE}$  under DT as compared to simple task. The Group by Task effect was  
172 used to examine our second hypothesis stating that the CP group would demonstrate significantly  
173 greater changes in  $D_{FPE}$  from the simple task to DT as compared to the TD group. Regression  
174 coefficients, confidence intervals and p values were calculated for each effect. The TD group and  
175 simple task were the reference effects in each model.

176 There was no missing data. The mean age, weight and height of the participants of both groups  
177 were reported. Mean values of  $D_{FPEAP}$ ,  $D_{FPEML}$ , walking speed, cadence, step length, step width  
178 and cognitive scores were reported per group under the three Tasks, including the simple walking  
179 task and the two dual-task trials. The mean values of the cadence, step length and step width  
180 were reported in order to get a better understanding of the  $D_{FPE}$  and its values but were not  
181 statistically analysed. The data distribution of  $D_{FPEAP}$  and  $D_{FPEML}$  in each group and under each  
182 Task was visually controlled.

183 For the cognitive scores, the data distribution in each group and under each Task was analysed  
184 using skewness and kurtosis z-scores (31, 32). When skewness and kurtosis z-scores were  
185 beyond 1.96, the data was qualified as not normally distributed (31) and were transformed with a  
186 logarithm ( $\log_{10}$ ). When the distribution was normal the data were compared using a T-test. When  
187 the data was not normal even after the logarithmic transformation, a non-parametrical paired test  
188 (Wilcoxon) was used. The level of significance was set at 0.05 for all analyses.

189 The methodology was controlled using the STROBE checklist for observational case-control  
190 studies.

## 191 **Results**

192 A total of 40 children responding to the selection criteria were integrated into this study.  
193 Participants were aged between 8 and 16 years old at the measurement time in the CP group and  
194 between 9 and 16 years in the TD group (Table 1). The CP group was formed of children with  
195 spastic unilateral ( $n=13$ , the affected side was left for 6 of them and 7 right) and bilateral ( $n=7$ , the  
196 more affected limb was left for 4 and right for 3) CP, 17 of them had a GMFCS level of I and 3 had  
197 a GMFCS level of II. Further details are available in Table 1.



198 **Table 1. Mean, standard deviation and range for the general characteristics of the**  
199 **participants.**

|                    | CP (n = 20) |       |             | TD (n = 20) |       |              |
|--------------------|-------------|-------|-------------|-------------|-------|--------------|
|                    | Mean        | SD    | Range       | Mean        | SD    | Range        |
| <b>Age (y; m)</b>  | 12y 6m      | 2y 4m | 8y – 16y 9m | 12y 6m      | 2y 4m | 9y 1m–16y 8m |
| <b>Height (m)</b>  | 1.55        | 1.57  | 1.24-1.90   | 1.52        | 1.42  | 1.27-1.77    |
| <b>Weight (Kg)</b> | 51.35       | 22.6  | 21-107      | 41.35       | 12.14 | 24-65        |

200 Abbreviations: SD: standard deviation; y: years; m: months; CP: cerebral palsy; TD: typical  
201 development

202 On average, **D<sub>FPEAP</sub>** and **D<sub>FPEML</sub>** were negative in both groups, meaning that the children placed  
203 their feet further and more lateral than the FPE respectively in the anteroposterior and the  
204 mediolateral directions. Figure 2 shows the distribution of the two primary outcomes **D<sub>FPEAP</sub>** and  
205 **D<sub>FPEML</sub>**, in each task and each group.

206 The ANOVA outputs showed that the global interaction between Groups and Tasks was not  
207 significant for **D<sub>FPEAP</sub>** ( $p=0.434$ ), meaning that the dual tasks had similar effects on both groups.  
208 Table 2 reports the differences between groups, supposedly the same for each task by the model  
209 without interaction (eq. 1), and between Tasks, supposedly the same for each group. **D<sub>FPEAP</sub>** was  
210 significantly lower during the dual tasks, than during the simple task for both groups ( $p=0.012$  in  
211 DT Count, and  $p<0.001$  in DT Animals), revealing a significant decrease of **D<sub>FPEAP</sub>** with the  
212 difficulty of the task (Figure 2).

213 The interaction was statistically significant for **D<sub>FPEML</sub>** ( $p=0.008$ ), meaning that the dual task effect  
214 was not equal between the groups. The model (equ. 2) with interaction was thus performed. Table  
215 3 reports the mean differences between Groups and Tasks. The main difference with **D<sub>FPEAP</sub>** is  
216 that there was no significant difference between Groups during the simple task.

217 Normalized gait speed was found to significantly contribute to **D<sub>FPE</sub>** in the ML direction and, more  
218 importantly, in the AP direction (Table 2). Indeed, for an increase of  $0.1s^{-1}$  the **D<sub>FPEAP</sub>** increases  
219 of 18.7 mm and the **D<sub>FPEML</sub>** increases of 1.7 mm.

220 Table 2 – Results of linear models for the **D<sub>FPE</sub>** (AP and ML)

|                                     | <b>D<sub>FPEAP</sub></b>    |                       |                  | <b>D<sub>FPEML</sub></b>    |                      |                  |
|-------------------------------------|-----------------------------|-----------------------|------------------|-----------------------------|----------------------|------------------|
|                                     | Regression coefficient [CI] | p value               |                  | Regression coefficient [CI] | p value              |                  |
| Intercept (TD - Simple task)        | -92.1                       | <b>[-102.5;-81.7]</b> | <b>&lt;0.001</b> | -90                         | <b>[-96.8;-83.2]</b> | <b>&lt;0.001</b> |
| Group                               | 31.8                        | <b>[26.8;36.8]</b>    | <b>&lt;0.001</b> | -2.0                        | [-7.1;-3.1]          | 0.441            |
| Task (Count)                        | -8.0                        | <b>[14.2;1.8]</b>     | <b>0.012</b>     | 5.8                         | <b>[0.6;10.9]</b>    | <b>0.029</b>     |
| Task (Animals)                      | -19.4                       | <b>[-27.9;-10.8]</b>  | <b>&lt;0.001</b> | -0.7                        | [-6.7;5.4]           | 0.830            |
| Group x Task (Count)                |                             |                       |                  | -7.7                        | <b>[-14.4;-1.0]</b>  | <b>0.025</b>     |
| Group x Task (Animals)              |                             |                       |                  | -9.8                        | <b>[-16.2;-3.5]</b>  | <b>0.003</b>     |
| Group x Task for CP group (Count)   |                             |                       |                  | -1.9                        | [-6.7;2.8]           | 0.420            |
| Group x Task for CP group (Animals) |                             |                       |                  | -10.5                       | <b>[-16.2;-4.8]</b>  | <b>&lt;0.001</b> |
| Normalized speed                    | 186.6                       | <b>[165.7;207.4]</b>  | <b>&lt;0.001</b> | 16.8                        | <b>[4.6;29.0]</b>    | <b>0.008</b>     |

221 TD: typically developing; CP: cerebral palsy; CI: confidence interval

## 222 Gait parameters

223 The mean speed and step length were lower in children with CP than in children with TD.  
 224 Meanwhile, the mean step width was higher in the CP group than in the TD group. The mean  
 225 speed and cadence lowered and the steps shortened in both groups with the dual task difficulty.  
 226 The step width did not change during all tasks in the TD group while it became wider in the CP  
 227 group when the difficulty of the cognitive task increased. The details are presented in Table 3.

228 **Table3. D<sub>FPE</sub> and gait parameters during simple and dual tasks in children with**  
**cerebral palsy (CP) and children with typical development (TD).**

229

|                                          |                           | TD             | CP             |
|------------------------------------------|---------------------------|----------------|----------------|
| <b>D<sub>FPE</sub>AP (mm)</b>            | <b>Simple gait</b>        | -48.6 (28.0)   | -38.2 (42.9)   |
|                                          | <b>DT<sub>count</sub></b> | -79.3 (45.3)   | -115.2 (46.1)  |
|                                          | <b>DT<sub>f/a</sub></b>   | -129.9 (46.9)  | -115.2 (46.1)  |
| <b>D<sub>FPE</sub>ML (mm)</b>            | <b>Simple gait</b>        | -85.8 (12.6)   | -90.4 (19.9)   |
|                                          | <b>DT<sub>count</sub></b> | -82.0 (11.8)   | -94.5 (22.1)   |
|                                          | <b>DT<sub>f/a</sub></b>   | -92.7 (17.7)   | -106.1 (25.6)  |
| <b>Normalized speed (s<sup>-1</sup>)</b> | <b>Simple gait</b>        | 0.79 (0.09)    | 0.68 (0.13)    |
|                                          | <b>DT<sub>count</sub></b> | 0.68 (0.11)    | 0.57 (0.14)    |
|                                          | <b>DT<sub>f/a</sub></b>   | 0.47 (0.14)    | 0.37 (0.16)    |
| <b>Cadence (step/min)</b>                | <b>Simple gait</b>        | 116.04 (7.95)  | 116.32 (13.76) |
|                                          | <b>DT<sub>count</sub></b> | 105.13 (13.98) | 108.13 (15.16) |
|                                          | <b>DT<sub>f/a</sub></b>   | 82.95 (19.88)  | 82.84 (19.67)  |
| <b>Step length (m)</b>                   | <b>Simple gait</b>        | 0.62 (0.06)    | 0.55 (0.08)    |
|                                          | <b>DT<sub>count</sub></b> | 0.59 (0.06)    | 0.51 (0.1)     |
|                                          | <b>DT<sub>f/a</sub></b>   | 0.5 (0.07)     | 0.41 (0.08)    |
| <b>Step width (m)</b>                    | <b>Simple gait</b>        | 0.07 (0.02)    | 0.09 (0.03)    |
|                                          | <b>DT<sub>count</sub></b> | 0.07 (0.02)    | 0.1 (0.04)     |
|                                          | <b>DT<sub>f/a</sub></b>   | 0.08 (0.03)    | 0.13 (0.04)    |

Mean (standard deviation) are presented for the simple task, the counting dual task (DT<sub>count</sub>) and the fluency dual task (DT<sub>f/a</sub>). The speed is normalized by leg length. Mm: millimeter; s: second; min: minute; m: Meter.

**Figure 2. Gait stability in the anteroposterior ( $D_{FPEAP}$ ) and mediolateral ( $D_{FPEML}$ ) directions.**

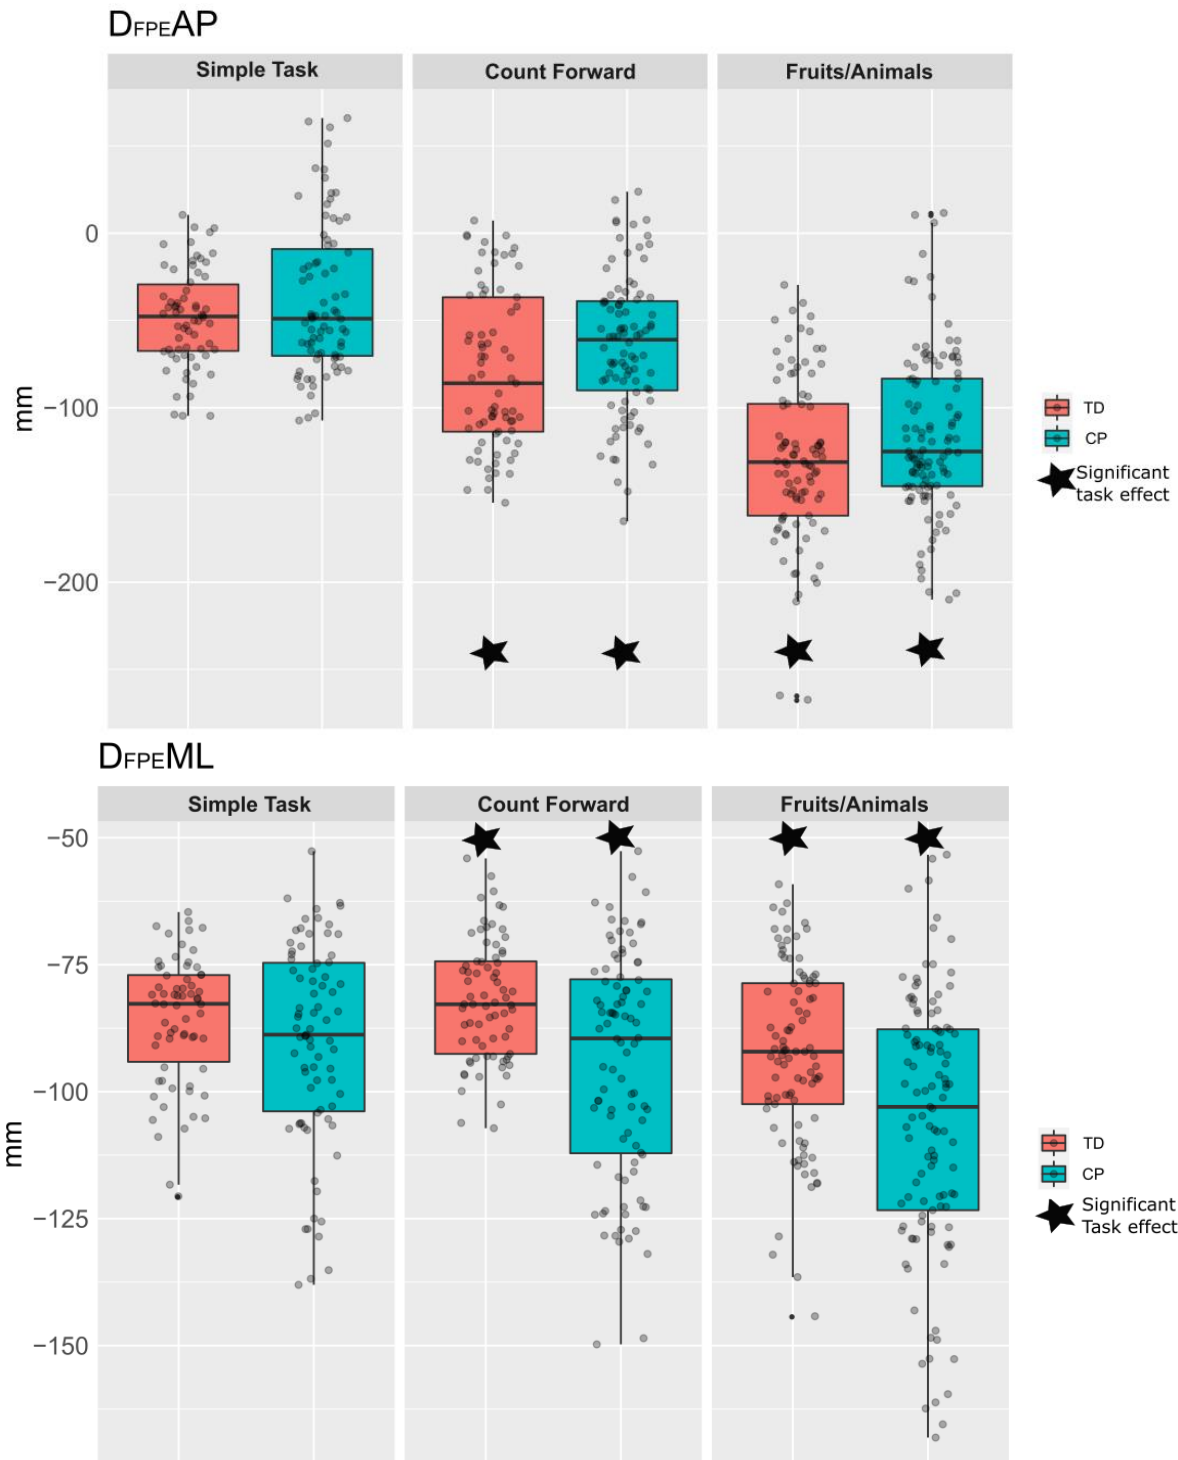

230 To allow a better visualisation of the results, we used the interquartile range (IQR) and median represented per task and per group, with each grey spot representing a participant. Black star represents a significant difference between the simple and the dual task. Red star represents a significant difference between the cerebral palsy (CP) and typical development (TD) groups.



231 In both groups, during  $DT_{\text{count}}$ , children gave significantly more answers during the simple cognitive  
232 task (sitting) than during dual-task (CP: 0.099 (0.135)  $\log_{10}(\text{answer/s})$ ,  $p=0.004$ ; TD: 0.1 (0.126)  
233  $\log_{10}(\text{answer/s})$ ,  $p=0.002$ ). It was not the case with  $DT_{f/a}$ , in which differences were not significant.  
234 Also, the TD group gave more answers per second than the CP group in every task. This  
235 difference was significant only during the fluency simple task (-0.107 (0.202) answer/s.,  $p=0.029$ ).

## 236 Discussion

237 We examined gait stability in children with CP during dual tasks. The main finding was that the CP  
238 group walked with a more stable gait under dual-task constraint than under simple gait task in  
239 both anteroposterior and mediolateral directions. In comparison, in the TD group, a task effect  
240 was observed in anteroposterior direction for both tasks, but not in the mediolateral direction. Our  
241 first hypothesis, which expected that children with CP would show a longer distance between real  
242 foot placement and FPE (a more stable gait) under dual tasks was verified.

243 In addition, a significant group effect was observed in  $D_{\text{FPEML}}$  for the counting task and the fluency  
244 task. Therefore, we could validate our second hypothesis, which stipulated that the impact of dual  
245 task would be higher in children with CP than in children with TD. Overall, these results show that  
246 the children with CP and with TD tend to stabilise their gait when under dual tasks. However  
247 children with TD had to significantly modify their gait only in the anteroposterior direction, which is  
248 highly influenced by the gait speed. Children with CP had to modify their stability in both directions.  
249 Finally, we showed that FPE can detect small changes in the gait of populations of children with  
250 CP and with TD.

251 Our results are in agreement with those of other studies. For example, Carcreff et al. (22) observed  
252 a similar dual-task cost between groups, on walking speed, stride length, hip range of motion,  
253 stride time and heel clearance. However, they obtained significant between-groups differences in  
254 the most difficult tasks' cost on the walk ratio (ratio step length/cadence) (22, 33). In our study,  
255 during both dual tasks, the CP group had a significantly lower  $D_{\text{FPEML}}$  than the TD group which  
256 was not significantly affected. This means that the CP group increased their stability while the TD  
257 group preserved its normal gait pattern. Tracy et al. (34) also found a "conservative stability  
258 strategy" in children with CP during different dual tasks activities, CP group had more lateral  
259 stability than children with TD. Finally, Katz Leurer et al. (21) found that children with CP tend to  
260 be affected by smaller changes than TD, because of lower basic motor capabilities and reduced  
261 attention, which matches our findings.

262 The fact that both gait parameters and cognitive scores were affected under dual-task constraint  
263 in the  $DT_{\text{count}}$  in both groups could be explained by the central capacity sharing model (35). This  
264 model explains how the central nervous system shares its capacity between both tasks and  
265 therefore both are impaired. For the fluency task, we witnessed nearly no cognitive score change  
266 between  $DT_{f/a}$  and the fruit and animal listing simple task. It seems that children in both groups  
267 adopted an adapted version of 'posture second' strategy (36), which could be described as  
268 "mobility second". Due to the difficulty of the cognitive task which required more attention and  
269 concentration, they kept their cognitive scores at the same level but had to secure their stability in  
270 both directions. In our study, children showed their ability to adapt their gait towards a more stable  
271 pattern. These results are similar to the ones of Reilly et al. (37), who tested stability during dual  
272 tasks while standing in children with CP. They found that their postural control was impacted by  
273 the dual task (37). In children with ataxia, the postural control was more impacted by the

274 supplementary task and their results in the cognitive task were lower in comparison with children  
275 with spastic CP (37). Those results, put together with ours, raise the question of whether the  
276 difficulty of the cognitive task is the cause, the baseline level of stability or the type of underlying  
277 brain lesion that most impact the dual tasks capacities of children with CP. The meta-analysis of  
278 Roostaiei et al. (38), described that the response of children with CP to dual task is highly  
279 influenced by their neuromuscular impairments.

280 In this study, we showed that walking speed and gait stability are linked, mostly in the  
281 anteroposterior direction. Carcreff et al. (22) showed that the CP group reduced their cadence  
282 (number of steps per minute) and step length simultaneously under dual tasks whereas in the TD  
283 group, only the cadence was mainly affected by the dual tasks. These findings show that children  
284 with TD can be affected in one gait parameter without any other impact whereas children with CP  
285 will be affected in more aspects of their gait. A recent meta-analysis underlines the negative impact  
286 of fast-walking speed on gait parameters such as stride length and gait velocity in children with  
287 CP. Indeed, they showed greater differences as compared to a TD matched group at fast-walking  
288 speed than at self-selected pace (39). Chakravarthy et al. (39) also suggested that gait parameter  
289 variabilities and kinematic abnormalities could be a consequence of the effort provided to maintain  
290 a good stability. Finally, walking speed which has been described as functional capacity is an  
291 important parameter which can influence activities of daily living as well as the quality of life (40,  
292 41).

## 293 **Limitations**

294 The first limit to be acknowledged was the large age span (from 8 to 16 years old). This implied a  
295 lot of differences in physical and cognitive maturation but had the advantage of representing the  
296 school-aged paediatric population as soon as their gait pattern is stabilised (42). We reduced the  
297 induced gait and cognitive differences by matching the patients per age and sex. Secondly, the  
298 biomechanical concept on which the DFE computation relies, the inverted pendulum model, needs  
299 few steps to calculate the stability. The advantage is that children had short trials. Its disadvantage  
300 is that the means were calculated based on few strides and are very sensitive to variations. This  
301 limit was constrained by the length of the gait laboratory walkway and can hardly be avoided. In  
302 order to analyse a few more strides in such settings, children would have to turn, which also implies  
303 gait stability challenges (43). A longer trial would also increase the difficulty of the cognitive tasks,  
304 to a greater extent for the listing of fruits and animals tasks, where the repertoire is often limited.  
305 Thirdly, the cognitive score differences between the cognitive simple tasks, and the dual tasks,  
306 have to be taken into account with caution as the sitting period always occurred after the dual-  
307 task due to the need to capture the walking period first, so a learning effect may explain part of  
308 the differences.

309 In the future, it would prove interesting to investigate the correlations between the real risk of fall  
310 and the FPE, as well as to determine the clinical minimal detectable changes which could be  
311 obtained using a mixed-methods model in different age categories. It is important to pursue  
312 research in this field to better understand the causes of the differences we observed and to be  
313 able to adapt therapies, for example by combining cognitive tasks with gait balance exercises, or  
314 to adapt the living context to the children.

## 315 **Conclusion**

316 In this study, we showed that the gait stability of children with mild CP and children with TD is  
317 modified under dual tasks. These modifications are most likely due to the shared attention  
318 between gait and the cognitive task. This means that cognitive and motor functions are linked, and  
319 that gait is not fully automatised. The importance of the gait compensation depends mainly upon  
320 the difficulty of the cognitive task. TD and CP children favoured a ‘cognitiv-first’ strategy during  
321 the dual task of naming animals and fruits alternatively and increased their stability. However,  
322 children’s preexisting disability, here CP, has an impact on the magnitude of their adaptations.  
323 This study underlined the impact of the child’s usual activity on gait stability and encourages  
324 clinicians to take this aspect into consideration for therapeutic management.

## 325 **Disclosure of Interest**

326 The authors declare that they have no competing interest.

## 327 **Acknowledgement**

328 The authors thank the participants and their families. We also thank Nathalie Valenza for her  
329 contributions in choosing the cognitive tasks and participating in the protocol design. We thank  
330 Antoine Poncet for his help on the statistical analysis. This work was supported by La Fondation  
331 Paralysie Cerebrale (Paris, France). Sjoerd M.Bruijn was funded by a VIDI grant  
332 (016.Vidi.178.014) from the Dutch Organization for Scientific Research (NWO).

## 333 **References**

334

335

- 336 1. Rosenbaum P, Paneth N, Leviton A, Goldstein M, Bax M, Damiano D, et al. A report: the  
337 definition and classification of cerebral palsy April 2006. *Developmental medicine and child*  
338 *neurology Supplement*. 2007;109:8-14.
- 339 2. Sellier E, Platt MJ, Andersen GL, Krägeloh-Mann I, De La Cruz J, Cans C, et al.  
340 Decreasing prevalence in cerebral palsy: a multi-site European population-based study, 1980 to  
341 2003. *Developmental Medicine & Child Neurology*. 2016;58(1):85-92.
- 342 3. Alemdaroglu E, Ozbudak SD, Mandiroglu S, Bicer SA, Ozgirgin N, Ucan H. Predictive  
343 Factors for Inpatient Falls among Children with Cerebral Palsy. *Journal of pediatric nursing*.  
344 2017;32:25-31.
- 345 4. Bruijn SM, Meijer OG, Beek PJ, van Dieen JH. Assessing the stability of human  
346 locomotion: a review of current measures. *Journal of the Royal Society, Interface*.  
347 2013;10(83):20120999.
- 348 5. Petridou E, Kedikoglou S, Andrie E, Farmakakis T, Tsigas A, Angelopoulos M, et al.  
349 Injuries among disabled children: a study from Greece. *Injury Prevention*. 2003;9(3):226-30.
- 350 6. Wight DL. A foot placement strategy for robust bipedal gait control. 2008.
- 351 7. Hausdorff JM, Purdon PL, Peng CK, Ladin Z, Wei JY, Goldberger AL. Fractal dynamics  
352 of human gait: stability of long-range correlations in stride interval fluctuations. *Journal of applied*  
353 *physiology* (Bethesda, Md : 1985). 1996;80(5):1448-57.
- 354 8. Hof AL. The ‘extrapolated center of mass’ concept suggests a simple control of balance  
355 in walking. *Human movement science*. 2008;27(1):112-25.
- 356 9. Dingwell JB, Cusumano JP. Nonlinear time series analysis of normal and pathological  
357 human walking. *Chaos: An Interdisciplinary Journal of Nonlinear Science*. 2000;10(4):848-63.

- 358 10. Hurmuzlu Y, Basdogan C. On the measurement of dynamic stability of human  
359 locomotion. *Journal of biomechanical engineering*. 1994;116(1):30-6.
- 360 11. Wight DL, Kubica EG, Wang DW. Introduction of the foot placement estimator: A  
361 dynamic measure of balance for bipedal robotics. *Journal of computational and nonlinear*  
362 *dynamics*. 2008;3(1).
- 363 12. Millard M, Wight D, McPhee J, Kubica E, Wang D. Human foot placement and balance in  
364 the sagittal plane. *Journal of biomechanical engineering*. 2009;131(12):121001.
- 365 13. Millard M, McPhee J, Kubica E. Foot Placement and Balance in 3D2012. 021015.1-.14 p.
- 366 14. Meyns P, Duysens J, Desloovere K. The arm posture in children with unilateral Cerebral  
367 Palsy is mainly related to antero-posterior gait instability. *Gait & posture*. 2016;49:132-5.
- 368 15. Bruijn SM, Millard M, van Gestel L, Meyns P, Jonkers I, Desloovere K. Gait stability in  
369 children with Cerebral Palsy. *Research in developmental disabilities*. 2013;34(5):1689-99.
- 370 16. Bruijn SM, Van Dieën JH. Control of human gait stability through foot placement. *Journal*  
371 *of The Royal Society Interface*. 2018;15(143):20170816.
- 372 17. Tramontano M, Morone G, Curcio A, Temperoni G, Medici A, Morelli D, et al. Maintaining  
373 gait stability during dual walking task: effects of age and neurological disorders. *European*  
374 *journal of physical and rehabilitation medicine*. 2017;53(1):7-13.
- 375 18. Pashler H. Dual-task interference in simple tasks: data and theory. *Psychological bulletin*.  
376 1994;116(2):220.
- 377 19. Fino PC, Mancini M, Curtze C, Nutt JG, Horak FB. Gait Stability Has Phase-Dependent  
378 Dual-Task Costs in Parkinson's Disease. *Frontiers in neurology*. 2018;9:373.
- 379 20. Boonyong S, Siu KC, van Donkelaar P, Chou LS, Woollacott MH. Development of  
380 postural control during gait in typically developing children: the effects of dual-task conditions.  
381 *Gait & posture*. 2012;35(3):428-34.
- 382 21. Katz-Leurer M, Rotem H, Meyer S. Effect of concurrent cognitive tasks on temporo-  
383 spatial parameters of gait among children with cerebral palsy and typically developed controls.  
384 *Developmental neurorehabilitation*. 2014;17(6):363-7.
- 385 22. Carcreff L, Fluss J, Allali G, Valenza N, Aminian K, Newman CJ, et al. The effects of dual  
386 tasks on gait in children with cerebral palsy. *Gait & posture*. 2019;70:148-55.
- 387 23. Wood E, Rosenbaum P. The gross motor function classification system for cerebral  
388 palsy: a study of reliability and stability over time. *Developmental medicine and child neurology*.  
389 2000;42(5):292-6.
- 390 24. Sauzeon H, Lestage P, Raboutet C, N'Kaoua B, Claverie B. Verbal fluency output in  
391 children aged 7–16 as a function of the production criterion: Qualitative analysis of clustering,  
392 switching processes, and semantic network exploitation. *Brain and Language*. 2004;89(1):192-  
393 202.
- 394 25. Baker RW. *Measuring Walking: A Handbook of Clinical Gait Analysis*: Wiley; 2013.
- 395 26. Havens KL, Mukherjee T, Finley JM. Analysis of biases in dynamic margins of stability  
396 introduced by the use of simplified center of mass estimates during walking and turning. *Gait &*  
397 *posture*. 2018;59:162-7.
- 398 27. de Leva P. Adjustments to Zatsiorsky-Seluyanov's segment inertia parameters. *Journal*  
399 *of biomechanics*. 1996;29(9):1223-30.
- 400 28. Jensen RK. Changes in segment inertia proportions between 4 and 20 years. *Journal of*  
401 *biomechanics*. 1989;22(6-7):529-36.
- 402 29. Tisserand R, Armand S, Allali G, Schnider A, Baillieux S. Cognitive-motor dual-task  
403 interference modulates mediolateral dynamic stability during gait in post-stroke individuals.  
404 *Human movement science*. 2018;58:175-84.
- 405 30. Barre A, Armand S. Biomechanical ToolKit: Open-source framework to visualize and  
406 process biomechanical data. *Computer methods and programs in biomedicine*. 2014;114(1):80-  
407 7.

- 408 31. Kim H-Y. Statistical notes for clinical researchers: assessing normal distribution (2) using  
409 skewness and kurtosis. *Restorative dentistry & endodontics*. 2013;38(1):52-4.
- 410 32. Prescott RJ. Editorial: Avoid being tripped up by statistics: Statistical guidance for a  
411 successful research paper. *Gait & posture*. 2018.
- 412 33. Sekiya N, Nagasaki H. Reproducibility of the walking patterns of normal young adults:  
413 test-retest reliability of the walk ratio (step-length/step-rate). *Gait & posture*. 1998;7(3):225-7.
- 414 34. Tracy JB, Petersen DA, Pigman J, Conner BC, Wright HG, Modlesky CM, et al. Dynamic  
415 stability during walking in children with and without cerebral palsy. *Gait & posture*. 2019;72:182-  
416 7.
- 417 35. Tombu M, Jolicœur P. A central capacity sharing model of dual-task performance.  
418 *Journal of Experimental Psychology: Human Perception and Performance*. 2003;29(1):3.
- 419 36. Yogev-Seligmann G, Hausdorff JM, Giladi N. The role of executive function and attention  
420 in gait. *Movement disorders: official journal of the Movement Disorder Society*. 2008;23(3):329-  
421 42.
- 422 37. Reilly DS, Woollacott MH, van Donkelaar P, Saavedra S. The interaction between  
423 executive attention and postural control in dual-task conditions: children with cerebral palsy.  
424 *Archives of physical medicine and rehabilitation*. 2008;89(5):834-42.
- 425 38. Roostaei M, Raji P, Morone G, Razi B, Khademi-Kalantari K. The effect of dual task  
426 conditions on gait and balance performance in children with cerebral palsy: a systematic review  
427 and meta-analysis of observational studies. *Journal of bodywork and movement therapies*.  
428 2020.
- 429 39. Chakravarthy U, Wong TY, Fletcher A, Piuat E, Evans C, Zlateva G, et al. Clinical risk  
430 factors for age-related macular degeneration: a systematic review and meta-analysis. *BMC*  
431 *ophthalmology*. 2010;10:31.
- 432 40. Jaspers E, Verhaegen A, Geens F, Van Campenhout A, Desloovere K, Molenaers G.  
433 Lower limb functioning and its impact on quality of life in ambulatory children with cerebral palsy.  
434 *European journal of paediatric neurology*. 2013;17(6):561-7.
- 435 41. Lepage C, Noreau L, Bernard P-M. Association between characteristics of locomotion  
436 and accomplishment of life habits in children with cerebral palsy. *Physical therapy*.  
437 1998;78(5):458-69.
- 438 42. Hallemans A, Verbecque E, Dumas R, Cheze L, Van Hamme A, Robert T.  
439 Developmental changes in spatial margin of stability in typically developing children relate to the  
440 mechanics of gait. *Gait & posture*. 2018;63:33-8.
- 441 43. Dixon PC, Stebbins J, Theologis T, Zavatsky AB. The use of turning tasks in clinical gait  
442 analysis for children with cerebral palsy. *Clinical biomechanics (Bristol, Avon)*. 2016;32:286-94.
